# Supplementary material for: Plant mercury accumulation and litter input to a Northern Sedge-dominated Peatland
Source: Copernicus journal article supplement (doi:10.5194/bg-20-2971-2023), 2023-07-24
Supplement: Supplementary file 1 [file bg-20-2971-2023-supplement.pdf]

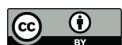

*Supplement of*

**Plant mercury accumulation and litter input to a Northern Sedge-dominated Peatland**

**Ting Sun and Brian A. Branfireun**

*Correspondence to:* Ting Sun (tsun64@uwo.ca)

The copyright of individual parts of the supplement might differ from the article licence.

23 *Study site and characteristics of plant species.* Samples were collected from a sedge-dominated fen  
24 (10.2 ha) located in an 817 ha sub-watershed of the Lake Superior basin near White River, Ontario,  
25 Canada (48°21' N, 85°21' W). The weather data (air temperature and precipitation) was provided by  
26 the Ontario Ministry of Natural Resources and Forestry, who installed a weather station and monitored  
27 the environmental conditions in this study site. The growing season is from June to August. The mean  
28 annual air temperature and precipitation from 2012 to 2018 were 1.7 °C and 721 mm, respectively. The  
29 mean air temperature in the growing season in 2018 and 2019 was  $15.82 \pm 3.50$  °C and  $15.16 \pm$   
30  $3.38$  °C, respectively. The total precipitation in the growing season in 2018 and 2019 was 243.9 mm  
31 and 189.3 mm, respectively. The mean water table levels in the growing season in 2018 and 2019 were  
32  $-6.3 \pm 1.0$  cm, and  $-7.5 \pm 3.9$  cm, respectively. There were no significant differences in air temperature  
33 and precipitation between the growing season in 2018 and 2019 (temperature:  $F_{(1,182)} = 1.74$ ,  $p > 0.05$ ;  
34 precipitation:  $F_{(1,182)} = 0.48$ ,  $p > 0.05$ ). The sedge-dominated fen is surrounded by a mixed-wood  
35 deciduous and coniferous forest with two small streams running along the northern and southwestern  
36 edges.

37 The sedge-dominated fen is mostly open, and the vegetation community is dominated by three sedge  
38 species: few-seeded sedge (*Carex oligosperma* Michx.), wire sedge (*Carex lasiocarpa* Ehrh), tussock  
39 sedge (*Carex stricta* Lamb.) (Lyons and Lindo, 2019). Sweet gale (*Myrica gale* L.) is the dominant  
40 shrub at this site (Lyons and Lindo, 2019; Palozzi and Lindo, 2017). The characteristics of these plants  
41 are described in Newmaster et al. (1997). In brief, the few-seeded sedge is 40–100 cm tall; their leaves  
42 are 1–3 mm wide, stiff, smooth, edges rolled in toward midrib and rounded in cross-section, and red-  
43 tinged at the base. The wire sedge is 30–100 cm tall; leaves are arching, narrow, 1–2 mm wide, wire-  
44 like, folded along the midrib, and angular. Tussock sedge is 40–140 cm tall; leaves are 3–6 mm wide,  
45 lowest leaves reduced to bladeless sheaths. Sweet gale is a deciduous shrub, up to 1.5 m tall; leaves are  
46 alternate, 3–6 cm long, toothed at the tip; sweet gale is a nitrogen-fixer and its root nodules contain  
47 symbiotic nitrogen-fixing bacteria. In this study, few-seeded sedges and wire sedges were mixed during  
48 plant sample collection as they are indistinguishable in size and form from one another when not in  
49 flower/seed.

50 *Foliar total mercury, C content, and N content.* In the laboratory, leaf samples for chemical analyses  
51 were rinsed three times with deionized water (18.2 M $\Omega$  cm) and then freeze-dried for 48 h. Freeze-  
52 dried leaf samples were subsequently ground and homogenized with a stainless-steel blade grinder. All  
53 powdered samples were stored in polyethylene bags for further chemical analysis. Precautions were  
54 performed to avoid any cross-contamination during the process. Disposable nitrile gloves were worn  
55 during sample handling. The blade grinder was thoroughly rinsed with deionized water (18.2 M $\Omega$  cm)  
56 after each sample grinding and completely dried with Kimwipes<sup>®</sup> (Kimtech Science<sup>™</sup>). THg in leaves  
57 was analyzed by thermal decomposition, amalgamation, and atomic absorption spectrometry using a  
58 Milestone<sup>™</sup> DMA-80 (EPA method 7473) with the National Research Council Canada, DORM-4 as the  
59 Certified Reference Material (CRM) to validate instrument recovery and stability. Each analytical run  
60 for THg included 10 % method blanks (empty sample boat), 10 % duplicates, and 20 % matrix spikes.  
61 The detection limit for THg was 0.05 ng g<sup>-1</sup>. All method blanks were below the detection limits. The  
62 relative standard deviation (RSD) was  $4.42 \pm 3.60$  % for all duplicate samples. Recoveries of THg for  
63 matrix spikes and CRM (DORM-4) were  $101.08 \pm 3.08$  %. All recoveries of matrix spikes and CRM  
64 were comparable well with the certified values: 25 ng and  $0.41 \pm 0.04$  mg kg<sup>-1</sup>, respectively.

65 Leaf C content (%C; w/w) and N content (%N; w/w) before and after the foliar Hg leaching experiment  
66 were analyzed using a CNSH analyzer (vario ISOTOPE cube; Elementar). The ratio of leaf C content  
67 and N content (C:N) was calculated. Birch leaf Organic Analytical Standard (*Betula papyrifera* Marsh.)  
68 was the CRM. Each analytical run for C and N included 10 % method blanks and 10 % duplicates (no  
69 matrix spikes for C and N). The detection limits for C and N were 0.26 mg g<sup>-1</sup> and 0.02 mg g<sup>-1</sup>,  
70 respectively. All method blanks were below the detection limits. The RSDs of C and N were  $0.28 \pm$   
71  $0.14$  % and  $4.73 \pm 3.05$  % for duplicate samples, respectively. Recoveries of CRM for C and N were  
72  $99.16 \pm 0.30$  %, and  $101.62 \pm 0.88$  % of the certified values, respectively.

73 *Dissolved total Hg concentrations analyses and QA/QC.* The dissolved total Hg (THg<sub>aq</sub>) concentrations  
74 in the rinse water and leachate were analyzed using Environmental Protection Agency (EPA) method  
75 1631. Samples were oxidized for 12 h with BrCl oxidation, neutralized using hydroxylamine, reduced  
76 to Hg<sup>0</sup> by SnCl<sub>2</sub> reduction, purged onto gold traps, thermally desorbed in argon, and finally analyzed

by cold vapor atomic fluorescence spectroscopy (CVAFS, Tekran 2600, Tekran Inc., Canada) (Bloom and Fitzgerald, 1988). The detection limit for  $\text{THg}_{\text{aq}}$  was  $0.072 \text{ ng L}^{-1}$ . The instrument, Tekran 2600, was calibrated daily. Each analytical run included 10 % method blanks (deionized water), 10 % sample duplicates, and 20 % matrix spikes. Check standards (made from 1000 ppm stock standard) were included in every ten samples. All method blanks were below the detection limit. The RSD was  $3.45 \pm 2.48 \%$  for all duplicate samples. Recoveries of matrix spikes and check standards were  $101.09 \pm 14.03 \%$  and  $104.60 \pm 6.37 \%$ , respectively.

*Dissolved organic matter concentration analyses and QA/QC.* Dissolved organic matter is quantified analytically as dissolved organic carbon (DOC). DOC concentrations in rinse water and leachate were measured using an iTOC Aurora 1030 (OI Analytical, College Station, TX, USA) using the persulfate wet oxidation method. Dissolved organic carbon in the liquid was oxidized to  $\text{CO}_2$  gas by the persulfate wet oxidation and the amount of  $\text{CO}_2$  was subsequently determined by measuring the infrared absorbance of  $\text{CO}_2$  gas. DOC concentrations in blanks were less than  $1 \text{ mg L}^{-1}$ . Each run included 10 % deionized water blanks, 10 % sample duplicates, 10 % matrix spikes, and check standards. Deionized water blanks were generally less than  $1 \text{ mg L}^{-1}$ . The RSD was  $1.58 \pm 1.83 \%$  for sample duplicates. Recoveries of matrix spikes and check standards were  $101.04 \pm 1.33 \%$  and  $104.60 \pm 5.36 \%$ , respectively. Concentrations of  $\text{THg}_{\text{aq}}$  and DOM in both rinse waters and leachate are presented as the mass of solute per mass of dry material.

*Characteristics of DOM and QA/QC data.* DOM in leachate was characterized as specific ultraviolet absorbance at a wavelength of 254 nm ( $\text{SUVA}_{254}$ ), an indicator of the molecular weight (or size) and aromaticity (the content of aromatic molecules) of DOM (Weishaar et al., 2003). Higher  $\text{SUVA}_{254}$  values suggest that DOM contains more high-molecular-weight and aromatic molecules (Weishaar et al., 2003). Sample absorbance was measured at  $\lambda = 254 \text{ nm}$  using a Horiba Aqualog® fluorescence spectrofluorometer with a xenon lamp.  $\text{SUVA}_{254}$  values were determined by dividing the absorbance at 254 nm by the DOM concentration of the same sample and multiplied by 100 and are reported in the unit of  $\text{L mg C}^{-1} \text{ m}^{-1}$  (Weishaar et al., 2003). There were no reference materials to assess method

performance, but 10 % of samples were run in duplicates. The RSDs of  $SUVA_{254}$  were  $0.62 \pm 0.29$  % for sample duplicates.

Fluorescence excitation-emission matrices (EEMs) were also collected for calculating informative optical indices that reflect differences in DOM characteristics in leachate using a Horiba Aqualog<sup>®</sup> fluorescence spectrofluorometer with a xenon lamp. The ultrapure closed water blank was used to correct the inner-effects of the Horiba Aqualog<sup>®</sup> fluorescence spectrofluorometer. Aqualog<sup>®</sup> directly reported the fluorescence intensity as arbitrary units (A.U.). The reported EEMs were then converted to optical indices using R Software (R Core Team 2012). Three common indices were chosen in this study: the fluorescence index (FI), the humification index ( $HIX_{EM}$ ), and the biological index or ‘freshness’ index (BIX). FI reflects DOM sources and characteristics with lower FI values ( $< 1.2$ ) indicating that DOM is terrestrially derived (resulting from decomposition and leaching of plant and soil organic matter) and has higher aromaticity, while higher FI values ( $> 1.8$ ) indicating that DOM is microbially derived (originating from processes as extracellular release and leachate of algae and bacteria) and has lower aromaticity (Fellman et al., 2010; McKnight et al., 2001).  $HIX_{EM}$  is an indicator of humic substance content or the extent of humification that converts lower-molecular weight organic matter derived from animal and plant products to more condensed and higher-molecular-weight organic matters by microbes. High  $HIX_{EM}$  ( $> 1.0$ ) values reflect the high humification of DOM and DOM is composed of more highly condensed and higher molecular weight molecules (Fellman et al., 2010; Hansen et al., 2016; Huguet et al., 2009; Ohno, 2002). BIX reflects the contribution of autochthonous (or microbially derived) DOM with higher BIX values ( $> 1.0$ ) reflecting that more low-molecular-weight DOM was recently produced by microbes (Fellman et al., 2010; Huguet et al., 2009). For FI,  $HIX_{EM}$ , and BIX, there were also no reference materials to assess method performance, but 10 % of samples were run in duplicates. The RSDs of FI,  $HIX_{EM}$ , and BIX were  $7.27 \pm 3.43$  %,  $2.05 \pm 2.77$  %, and  $3.48 \pm 3.50$  % for sample duplicates respectively.

129 **References**

- 130 Bloom, N. and Fitzgerald, W. F.: Determination of volatile mercury species at the picogram level by  
131 low-temperature gas chromatography with cold-vapour atomic fluorescence detection. *Anal.*  
132 *Chim. Acta*, 208, 151-161, DOI:10.1016/S0003-2670(00)80743-6, 1988.
- 133 Fellman, J. B., Hood, E., and Spencer, R. G.: Fluorescence spectroscopy opens new windows into  
134 dissolved organic matter dynamics in freshwater ecosystems: A review. *Limnol. Oceanogr.*, 55,  
135 2452-2462, DOI:10.4319/lo.2010.55.6.2452, 2010.
- 136 Hansen, A. M., Kraus, T. E., Pellerin, B. A., Fleck, J. A., Downing, B. D., Bergamaschi, B. A.: Optical  
137 properties of dissolved organic matter (DOM): Effects of biological and photolytic degradation.  
138 *Limnol. Oceanogr.*, 61, 1015-1032, DOI:10.1002/lno.10270, 2016.
- 139 Huguet, A., Vacher, L., Relexans, S., Saubusse, S., Froidefond, J. M., Parlanti, E.: Properties of  
140 fluorescent dissolved organic matter in the Gironde Estuary, *Org. Geochem.*, 40, 706-719,  
141 DOI:10.1016/j.orggeochem.2009.03.002, 2009.
- 142 Lyons, C. L. and Lindon, Z.: Above-and belowground community linkages in boreal peatlands. *Plant*  
143 *Ecol.*, 221, 615-632, DOI:10.1007/s11258-020-01037-w, 2019.
- 144 McKnight, D. M., Boyer, E. W., Westerhoff, P. K., Doran, P. T., Kulbe, T., Andersen, D. T.:  
145 Spectrofluorometric characterization of dissolved organic matter for indication of precursor  
146 organic material and aromaticity, *Limnol. Oceanogr.*, 46, 38-48,  
147 DOI:10.4319/lo.2001.46.1.0038, 2001.
- 148 Newmaster, S. G., Harris, A. G., and Kershaw, L. J.: *Wetland plants of Ontario*. Lone Pine Publishing,  
149 Edmonton, Canada. 1997.
- 150 Ohno, T.: Fluorescence inner-filtering correction for determining the humification index of dissolved  
151 organic matter, *Environ. Sci. Technol.*, 36, 742-746, DOI:10.1021/es0155276, 2002.
- 152 Weishaar, J. L., Aiken, G. R., Bergamaschi, B. A., Fram, M. S., Fujii, R., Mopper, K.: Evaluation of  
153 specific ultraviolet absorbance as an indicator of the chemical composition and reactivity of  
154 dissolved organic carbon, *Environ. Sci. Technol.*, 37, 4702-4708, DOI:10.1021/es030360x,  
155 2003.
